# Supplementary material for: Methoxyquinoline-diethylenetriamine conjugate as a fluorescent zinc sensor
Source: Royal Society of Chemistry journal article supplement (doi:10.1039/c0dt00791a), 2011-01-01
Supplement: c0dt00791a.pdf [file c0dt00791a.pdf]

Supplementary Information for

**Methoxyquinoline-Diethylenetriamine Conjugate as a Fluorescent Zinc Sensor**

Yuji Mikata,<sup>\*a</sup> Azusa Yamashita,<sup>b</sup> Keiko Kawata,<sup>b</sup> Hideo Konno,<sup>c</sup> Saori Itami,<sup>d</sup> Keiko

Yasuda<sup>d</sup> and Satoshi Tamotsu<sup>d</sup>

*<sup>a</sup>KYOUSEI Science Center, <sup>b</sup>Department of Chemistry and <sup>d</sup>Department of Biological Sciences,*

*Nara Women's University, Nara 630-8506, Japan and <sup>c</sup>National Institute of Advanced*

*Industrial Science and Technology (AIST), 1-1-1 Higashi, Tsukuba, Ibaraki 305-8565, Japan*

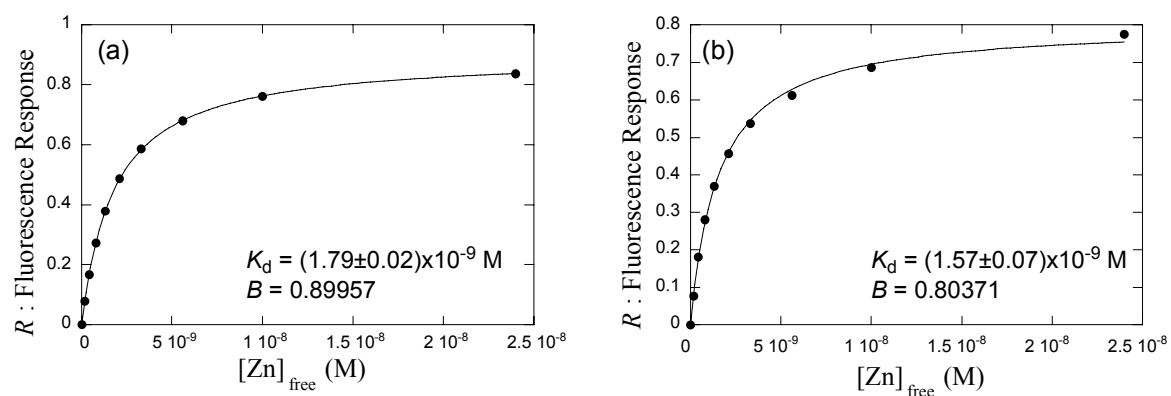

**Figure S1.** Curve-fitting for calculation of dissociation constants ( $K_d$ ) of (a) 6-MeOBQDIEN and (b) BQDIEN with zinc ion. Experimental data are fitted to equation (1) (see text) using KaleidaGraph software.
